# Supplementary material for: Along urbanization sprawl, exotic plants distort native bee (Hymenoptera: Apoidea) assemblages in high elevation Andes ecosystem
Source: PeerJ. 2018 Nov 7;6:e5916. doi: 10.7717/peerj.5916 (PMC6228549; doi:10.7717/peerj.5916)
Supplement: Supplemental Information 2 — Raw data used for the analysis of the landscape variables over native bee richness and abundance. [file peerj-06-5916-s002.xlsx]

## Sheet: season 2016-2017
Site	native bee richness	Relative native bee abundance	site distance to urbanization (meters)	site distance to roads (meters)	site infraestructures (square meters)	site altitude (meters)	Density native flora average	Density exotic flora average
1	8	25	125.384	246.855	0	2398	0.543431	1.00931
2	5	7	81.3917	92.5791	0	2585	1.30243	1.0511
3	4	27	313.948	153.593	0	2749	5.11978	0.311978
4	10	44	167.702	136.309	0	2728	1.04502	0.0281
5	14	41	56.7871	119.028	0	2397	0.087431	1.44721
6	19	44	1120.07	94.9297	484.967	2335	1.97128	0.0484781
7	3	5	1714.14	114.166	0	2362	0.084781	0.000981
8	7	20	936.385	72.9232	0	2465	0.0765931	0.071281

## Sheet: season 2017-2018
Site	native bee richness	Relative native bee abundance	site distance to urbanization (meters)	site distance to roads (meters)	site infraestructures (square meters)	site altitude (meters)	Density native flora average	Density exotic flora average
1	15	207	125.384	246.855	0	2398	0.596875	1.44375
2	17	61	81.3917	92.5791	0	2585	1.74688	1.29531
3	11	65	313.948	153.593	0	2749	5.55313	0.745313
4	14	57	167.702	136.309	0	2728	1.18906	0.3625
5	23	247	56.7871	119.028	0	2397	0.221875	1.88125
6	21	109	1120.07	94.9297	484.967	2335	1.31563	0.0828125
7	7	26	1714.14	114.166	0	2362	0.428125	0.003125
8	14	68	936.385	72.9232	0	2465	0.410937	0.415625
