# Supplementary material for: Along urbanization sprawl, exotic plants distort native bee (Hymenoptera: Apoidea) assemblages in high elevation Andes ecosystem
Source: PeerJ. 2018 Nov 7;6:e5916. doi: 10.7717/peerj.5916 (PMC6228549; doi:10.7717/peerj.5916)
Supplement: Supplemental Information 3 — Raw data used for the analysis of the relationship of exotic floral abundance over the high-altitude bee assemblage. [file peerj-06-5916-s003.xlsx]

## Sheet: abundance season 2016-2017
			functional traits
Site	relative native bee abundance	density exotic flora average	non-parasitic proportion	parasitic proportion	polylectic proportion	oligolectic proportion	small body size proportion	medium body size proportion	large body size proportion
1	25	1.00931	0.96	0.04	0.666667	0.333333	0.6	0.4	0
2	7	1.0511	1	0	0.428571	0.571429	0.285714	0.285714	0.428571
3	27	0.311978	1	0	0.814815	0.185185	0.777778	0.037037	0.185185
4	44	0.0281	0.909091	0.0909091	0.682927	0.317073	0.704545	0.0454545	0.25
5	41	1.44721	0.97561	0.0243902	0.780488	0.219512	0.365854	0.414634	0.219512
6	44	0.0484781	0.977273	0.0227273	0.860465	0.139535	0.113636	0.181818	0.704545
7	5	0.000981	1	0	0.4	0.6	0.6	0	0.4
8	20	0.071281	1	0	0.4	0.6	0.75	0.1	0.15

## Sheet: abundance season  2017-2018
			functional traits
Site	relative native bee abundance	density exotic flora average	non-parasitic proportion	parasitic proportion	polylectic proportion	oligolectic proportion	small body size proportion	medium body size proportion	large body size proportion
1	207	1.44375	1	0	0.908213	0.0917874	0.845411	0.130435	0.0241546
2	61	1.29531	0.983607	0.0163934	0.754098	0.245902	0.459016	0.131148	0.409836
3	65	0.745313	1	0	0.846154	0.153846	0.692308	0.107692	0.2
4	57	0.3625	0.982759	0.0172414	0.844828	0.155172	0.362069	0.0862069	0.551724
5	247	1.88125	0.987805	0.0121951	0.721311	0.278689	0.550607	0.388664	0.0607287
6	109	0.0828125	0.981651	0.0183486	0.841121	0.158879	0.220183	0.12844	0.651376
7	26	0.003125	1	0	0.846154	0.153846	0.307692	0.153846	0.538462
8	68	0.415625	1	0	0.926471	0.0735294	0.514706	0.176471	0.308824

## Sheet: richness season 2016-2017
			functional traits
Site	native bee richness	density exotic flora average	non-parasitic proportion	parasitic proportion	polylectic proportion	oligolectic proportion	small body size proportion	medium body size proportion	large body size proportion
1	8	1.00931	0.875	0.125	0.428571	0.571429	0.428571	0.571429	0
2	5	1.0511	1	0	0.4	0.6	0.4	0.2	0.4
3	4	0.311978	1	0	0.5	0.5	0.75	0	0.25
4	10	0.0281	0.8	0.2	0.777778	0.222222	0.5	0	0.5
5	14	1.44721	0.928571	0.0714286	0.571429	0.428571	0.357143	0.285714	0.357143
6	19	0.0484781	0.947368	0.0526316	0.722222	0.277778	0.210526	0.210526	0.578947
7	3	0.000981	1	0	0.666667	0.333333	0.333333	0	0.666667
8	7	0.071281	1	0	0.571429	0.428571	0.714286	0	0.285714

## Sheet: richness season 2017-2018
			functional traits
Site	native bee richness	density exotic flora average	non-parasitic proportion	parasitic proportion	polylectic proportion	oligolectic proportion	small body size proportion	medium body size proportion	large body size proportion
1	15	1.44375	1	0	0.733333	0.266667	0.266667	0.466667	0.266667
2	17	1.29531	0.941176	0.0588235	0.647059	0.352941	0.411765	0.235294	0.352941
3	11	0.745313	1	0	0.545455	0.454545	0.454545	0.181818	0.363636
4	14	0.3625	0.933333	0.0666667	0.733333	0.266667	0.266667	0.133333	0.6
5	23	1.88125	0.909091	0.0909091	0.714286	0.285714	0.409091	0.363636	0.227273
6	21	0.0828125	0.952381	0.047619	0.7	0.3	0.380952	0.238095	0.380952
7	7	0.003125	1	0	0.714286	0.285714	0.571429	0.142857	0.285714
8	14	0.415625	1	0	0.714286	0.285714	0.5	0.214286	0.285714
